# Supplementary material for: In vivo isotope tracing reveals a requirement for the electron transport chain in glucose and glutamine metabolism by tumors
Source: PubMed Central journal article supplement (PMC9432826; doi:10.1126/sciadv.abn9550), 2022-08-31
Supplement: sciadv.abn9550_sm.pdf [file sciadv.abn9550_sm.pdf]

Supplementary Materials for

**In vivo isotope tracing reveals a requirement for the electron transport chain  
in glucose and glutamine metabolism by tumors**

Panayotis Pachnis *et al.*

Corresponding author: Ralph J. DeBerardinis, [ralph.deberardinis@utsouthwestern.edu](mailto:ralph.deberardinis@utsouthwestern.edu)

*Sci. Adv.* **8**, eabn9550 (2022)  
DOI: 10.1126/sciadv.abn9550

**The PDF file includes:**

Figs. S1 to S4

**Other Supplementary Material for this manuscript includes the following:**

Data files S1 and S2

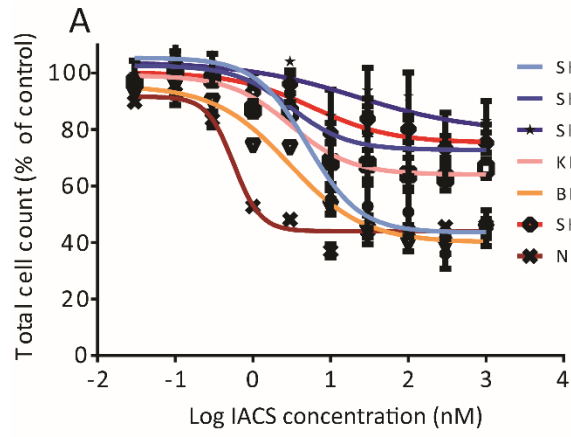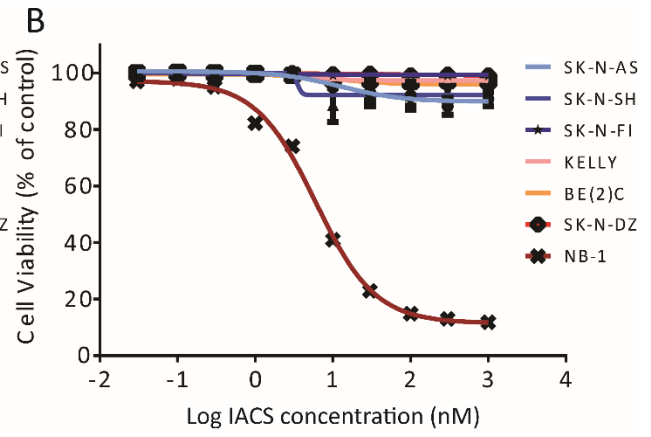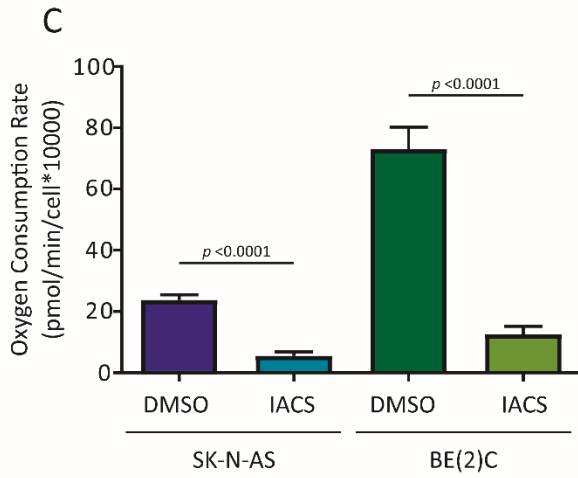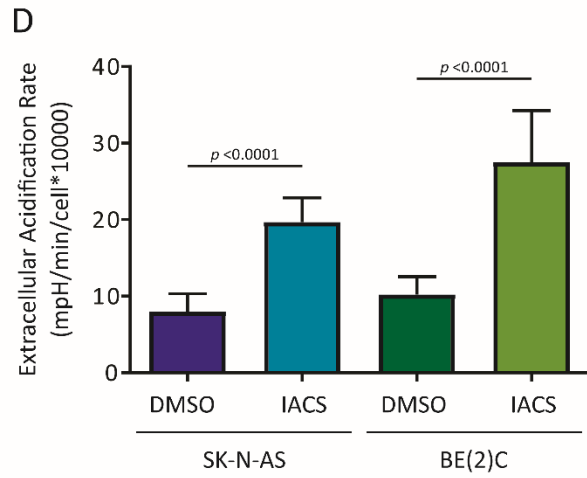

**Figure S1: IACS-010759 suppresses OXPHOS in vitro**

(A) Total cell count as a percentage of untreated control cells, across a panel of 7 neuroblastoma cell lines.

Data are expressed as average and SD.

(B) Viability as a percentage of untreated control cells, across a panel of 7 neuroblastoma cell lines. Data

are expressed as average and SD.

(C and D) Oxygen consumption and extracellular acidification rates in SK-N-AS and BE(2)C cells treated with 100nM IACS-010759 or DMSO. Data are expressed as average and SD.

Statistical significance was assessed using  $\log_2$ -transformed one-way ANOVA followed by Sidak's multiple comparisons adjustment (C, D). Statistical tests were two-sided. Data represent mean  $\pm$  SD. \*p = 0.01 - 0.05, \*\*p = 0.001 - 0.01, \*\*\*p = 0.0001 - 0.001.

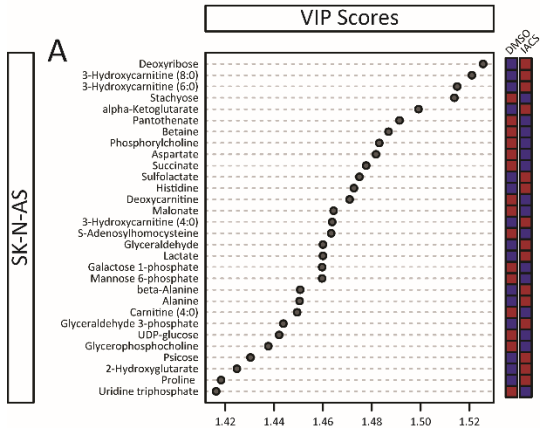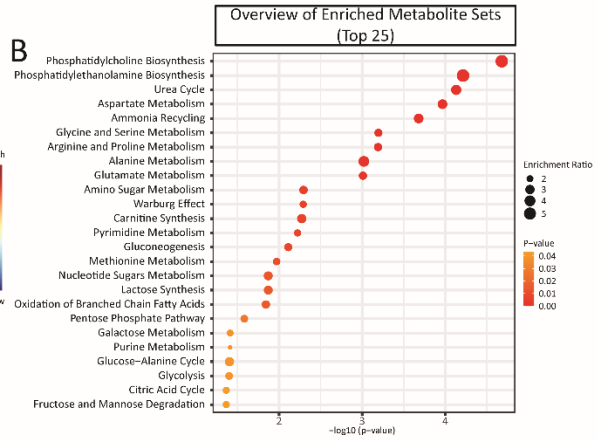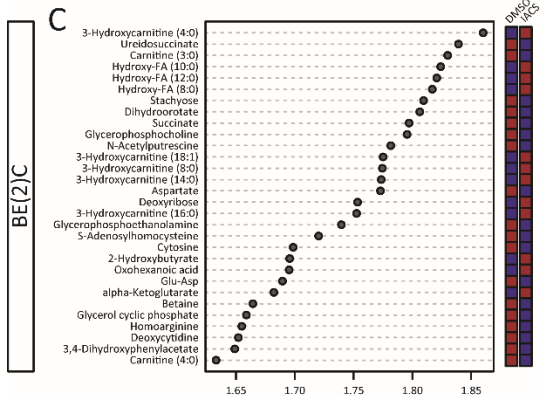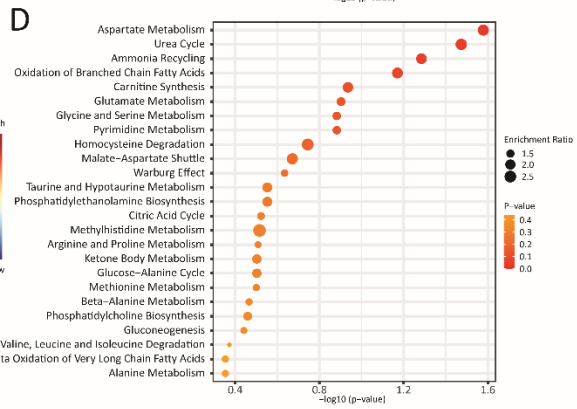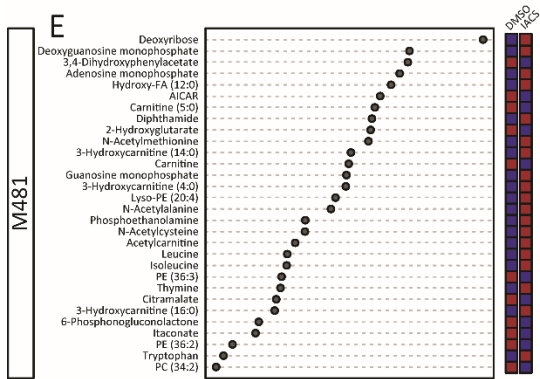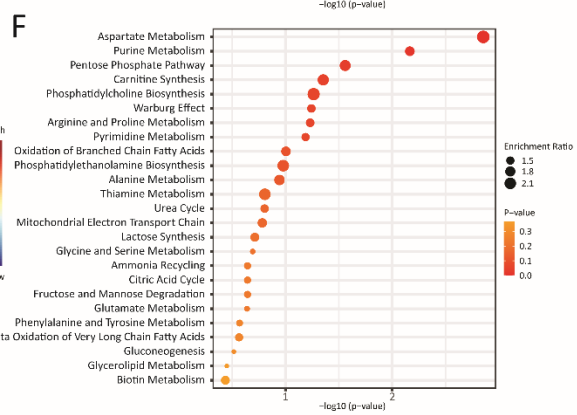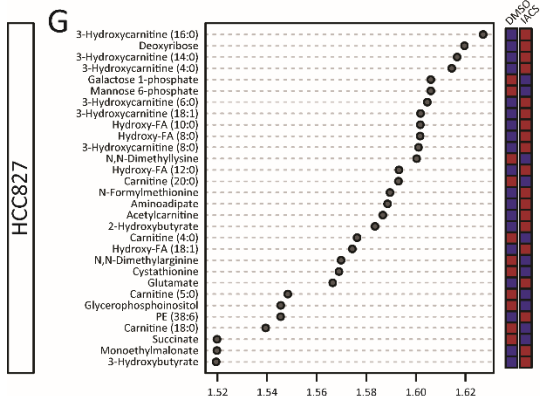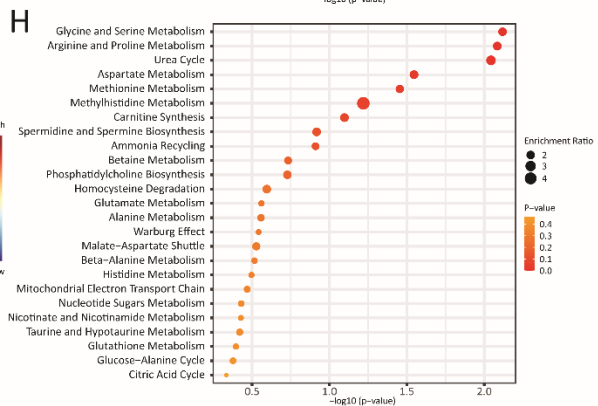

**Figure S2: Metabolic changes following treatment with IACS-010759**

(A, C, E and G) Partial Least Squares Discriminant Analysis (PLS-DA) showing the 30 metabolites with the highest Variable Importance in Projection (VIP) score for each tumor type, comparing DMSO and IACS-010759-treated tumors (SK-N-AS DMSO n=7, IACS-010759 n=7; BE(2)C DMSO n=7, IACS-010759 n=7; M481 DMSO n=5, IACS-010759 n=5; HCC827 DMSO n=4, IACS-010759 n=4).

(B, D, F and H) Metabolite Set Enrichment Analysis (MSEA) performed on all metabolites with VIP scores >1 for each tumor type, comparing DMSO and IACS-010759-treated tumors (SK-N-AS DMSO n=7, IACS-010759 n=7; BE(2)C DMSO n=7, IACS-010759 n=7; M481 DMSO n=5, IACS-010759 n=5; HCC827 DMSO n=4, IACS-010759 n=4).

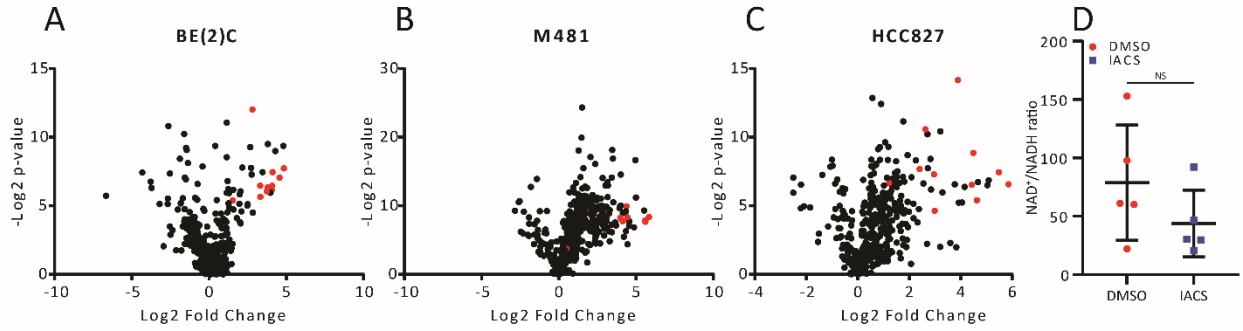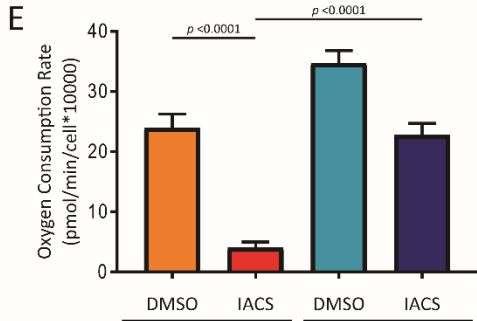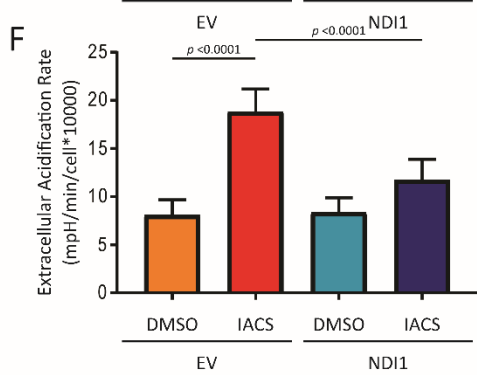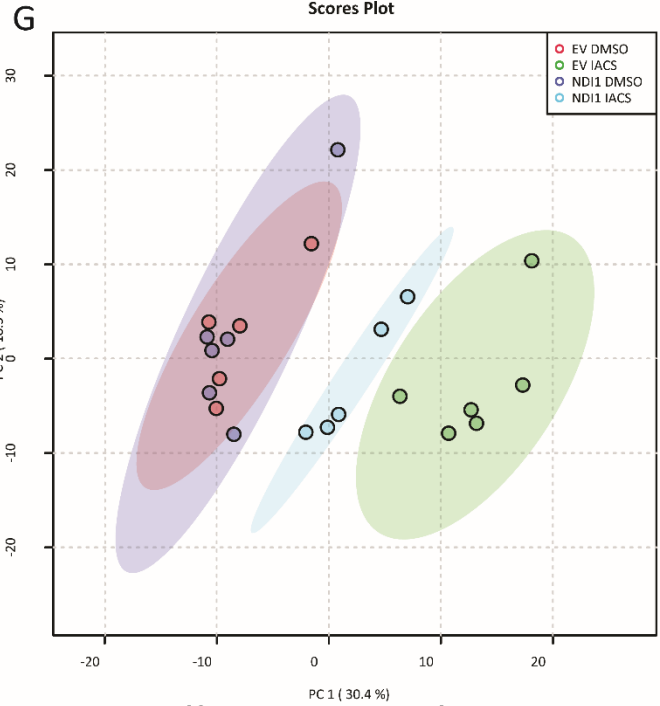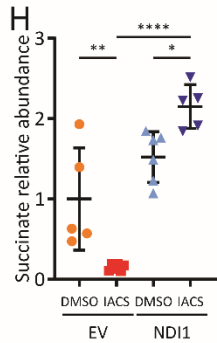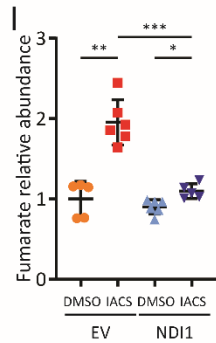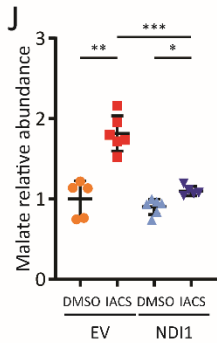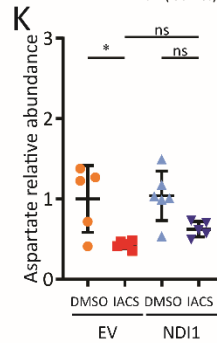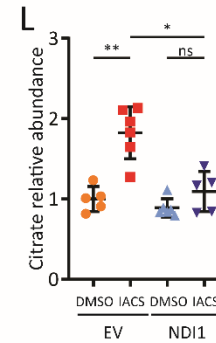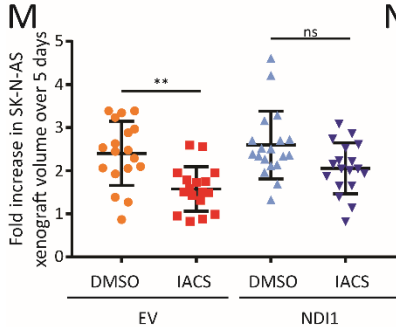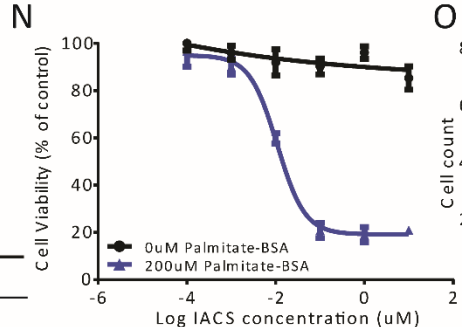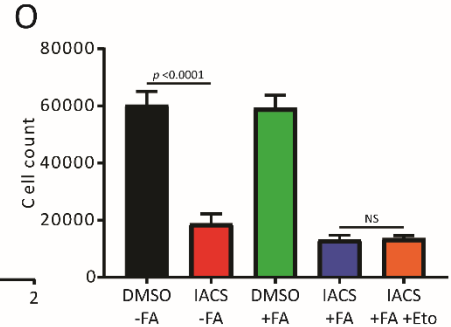

**Figure S3: NDI1 expression rescues some IACS-010759-mediated metabolic alterations**

(A - C) Untargeted metabolomics analysis demonstrates increased 3-hydroxyacylcarnitine abundance in IACS-010759 versus DMSO treated neuroblastoma (BE(2)C, A), melanoma (M481, B) and NSCLC (HCC827, C) xenografts. Red dots are 3-hydroxyacylcarnitines (BE(2)C DMSO n=7, IACS-010759 n=7; M481 DMSO n=5, IACS-010759 n=5; HCC827 DMSO n=4, IACS-010759 n=4).

(D) NAD<sup>+</sup>/NADH ratio in DMSO- and IACS-010759-treated tumors. These ratios were determined by quantifying NAD<sup>+</sup> and NADH in each sample.

(E and F) Oxygen consumption and extracellular acidification rates in SK-N-AS cells expressing either NDI1 or a control vector (EV) and treated with either IACS-010759 or DMSO.

(G) Principal component analysis on metabolomics data from SK-N-AS tumors expressing NDI1 (DMSO n=6, IACS-010759 n=5) or EV control (DMSO n=5, IACS-010759 n=6).

(H - L) Relative abundance of TCA cycle-related metabolites from SK-N-AS tumors expressing either NDI1 or EV control (EV DMSO n=5, IACS-010759 n=6; NDI1 DMSO n=6, IACS-010759 n=5).

(M) Fold increase in SK-N-AS tumor volume over 5 days in tumors expressing NDI1 or EV control (EV DMSO n=5, IACS-010759 n=6; NDI1 DMSO n=6, IACS-010759 n=5).

(N) Viability of SK-N-AS cells co-treated with IACS-010759 and 200μM palmitate.

(O) SK-N-AS cell count following 72 hours incubation with 1μM IACS-010759, 100μM palmitate and 5μM etomoxir. Statistical significance was assessed using Student's *t*-test (D), one-way ANOVA followed by Sidak's multiple comparisons adjustment (E, F), Welch's one-way ANOVA test followed by Dunnett's T3 method (H-J, L, O) or Kruskal-Wallis test followed by Dunn's method (K) for multiple comparisons adjustment on the log<sub>2</sub> transformed data, or log<sub>2</sub>-transformed one-way ANOVA followed by Sidak's multiple comparisons adjustment (M). Statistical tests were two-sided. Data represent mean ± SD. \**p* = 0.01 - 0.05, \*\**p* = 0.001 - 0.01, \*\*\**p* = 0.0001 - 0.001, \*\*\*\**p* < 0.0001.

A

WT (7 A repeat) TACTCCGGaaaaaaaaGAACCATTTGGATAC  
 M405 (6 A repeat) TACTCCGG-AAAAAAGAACCATTTGGATAC

B

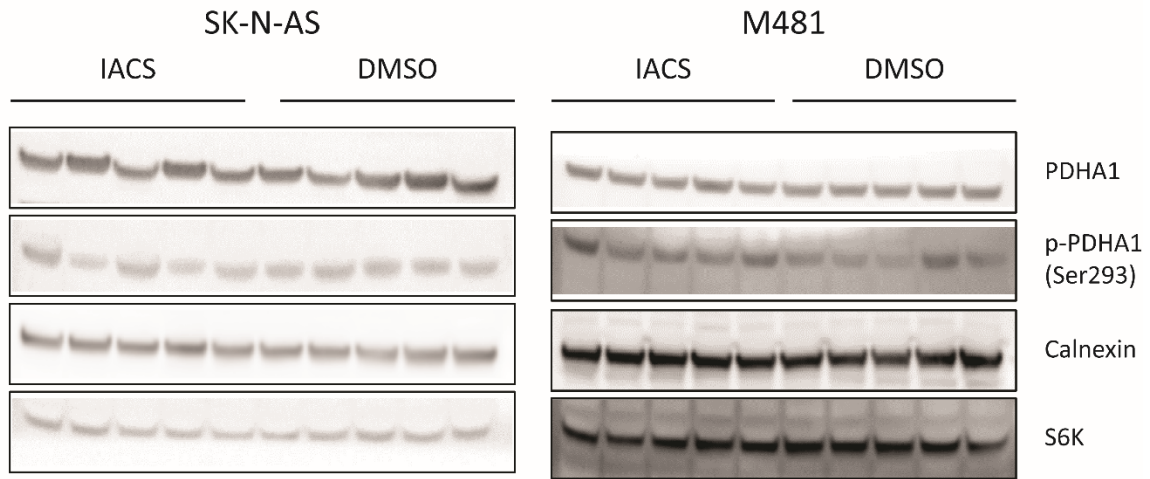

C

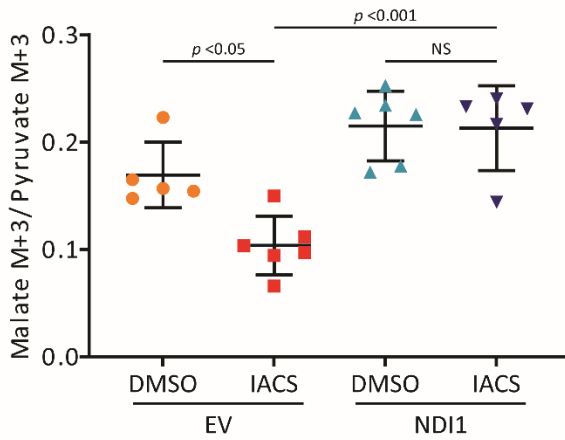

D

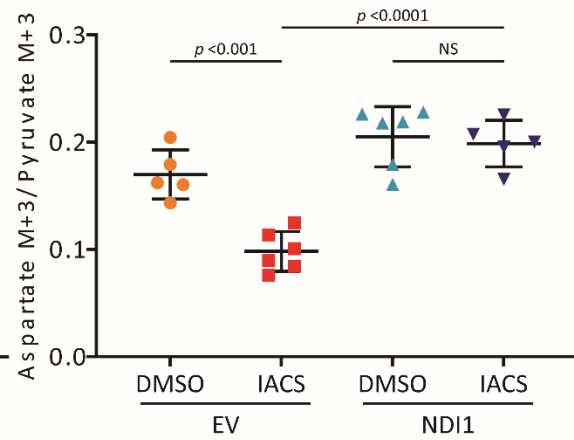

E

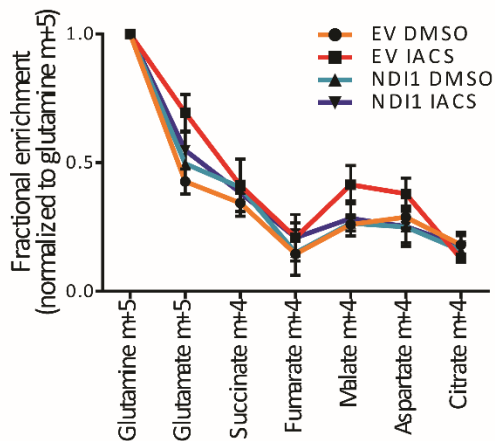

F

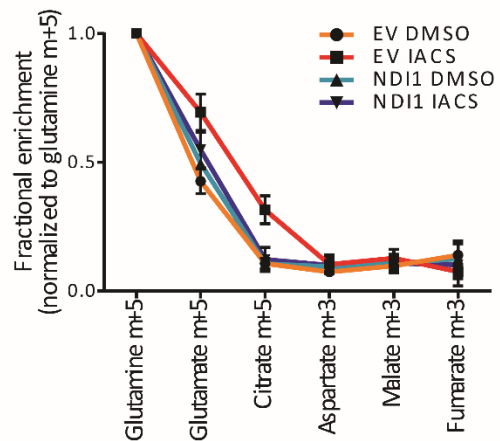



**Figure S4: Additional metabolic effects of IACS-010759 in xenografts**

(A) Single nucleotide deletion in the *MT-COI* gene detected in mitochondrial DNA (mtDNA) from M405 xenografts.

(B) Western blot showing PDHA1 and p-PDHA1 (Ser293) expression in DMSO and IACS-010759 treated SK-N-AS and M481 xenografts.

(C) Malate m+3/pyruvate m+3 ratio in SK-N-AS xenografts expressing EV or NDI1 and treated with DMSO or IACS-010759.

(D) Aspartate m+3/pyruvate m+3 ratio in SK-N-AS xenografts expressing EV or NDI1 and treated with DMSO or IACS-010759.

(E-F) Fractional enrichment in the oxidative (E) and reductive (F) pathways normalized to glutamine m+5 in SK-N-AS xenograft tumors expressing either NDI1 or a control vector (EV). Tumors were treated with either IACS-010759 or DMSO (EV DMSO n=6, IACS-010759 n=6; NDI1 DMSO n=7, IACS-010759 n=7).

Statistical significance was assessed using one-way ANOVA followed by Sidak's multiple comparisons adjustment (C-F). Statistical tests were two-sided. Data represent mean  $\pm$  SD. \*p = 0.01 - 0.05, \*\*p = 0.001 - 0.01, \*\*\*p = 0.0001 - 0.001.
